1  
2  
3  
4  
5  
6  
7  
8  
9  
10  
11  
12

**A simple, cost-effective, and robust method for rRNA depletion in RNA-sequencing studies**

Peter H. Culviner<sup>1\*</sup>, Chantal K. Guegler<sup>1\*</sup>, Michael T. Laub<sup>1-3</sup>

\*These authors contributed equally to this work. See Acknowledgements for explanation of order.

<sup>1</sup>Department of Biology, Massachusetts Institute of Technology, Cambridge, MA 02139, USA

<sup>2</sup>Howard Hughes Medical Institute, Massachusetts Institute of Technology, Cambridge, MA 02139, USA

<sup>3</sup>Correspondence can be addressed to MTL: [laub@mit.edu](mailto:laub@mit.edu), 617-324-0418

## 13 **Abstract**

14 The profiling of gene expression by RNA-sequencing (RNA-seq) has enabled powerful studies of  
15 global transcriptional patterns in all organisms, including bacteria. Because the vast majority of  
16 RNA in bacteria is ribosomal RNA (rRNA), it is standard practice to deplete the rRNA from a  
17 total RNA sample such that the reads in an RNA-seq experiment derive predominantly from  
18 mRNA. One of the most commonly used commercial kits for rRNA depletion, the Ribo-Zero kit  
19 from Illumina, was recently discontinued. Here, we report the development a simple, cost-  
20 effective, and robust method for depleting rRNA that can be easily implemented by any lab or  
21 facility. We first developed an algorithm for designing biotinylated oligonucleotides that will  
22 hybridize tightly and specifically to the 23S, 16S, and 5S rRNAs from any species of interest.  
23 Precipitation of these oligonucleotides bound to rRNA by magnetic streptavidin beads then  
24 depletes rRNA from a complex, total RNA sample such that ~75-80% of reads in a typical RNA-  
25 seq experiment derive from mRNA. Importantly, we demonstrate a high correlation of RNA  
26 abundance or fold-change measurements in RNA-seq experiments between our method and the  
27 previously available Ribo-Zero kit. Complete details on the methodology are provided, including  
28 open-source software for designing oligonucleotides optimized for any bacterial species or  
29 metagenomic sample of interest.

30

## 31 **Importance**

32 The ability to examine global patterns of gene expression in microbes through RNA-sequencing  
33 has fundamentally transformed microbiology. However, RNA-seq depends critically on the  
34 removal of ribosomal RNA from total RNA samples. Otherwise, rRNA would comprise upwards  
35 of 90% of the reads in a typical RNA-seq experiment, limiting the reads coming from messenger  
36 RNA or requiring high total read depth. A commonly used, kit for rRNA subtraction from Illumina  
37 was recently discontinued. Here, we report the development of a 'do-it-yourself' kit for rapid, cost-  
38 effective, and robust depletion of rRNA from total RNA. We present an algorithm for designing  
39 biotinylated oligonucleotides that will hybridize to the rRNAs from a target set of species. We then  
40 demonstrate that the designed oligos enable sufficient rRNA depletion to produce RNA-seq data  
41 with 75-80% of reads coming from mRNA. The methodology presented should enable RNA-  
42 seq studies on any species or metagenomic sample of interest.

## 43 **Introduction**

44 RNA-sequencing (RNA-seq) is a common and powerful approach for interrogating global patterns  
45 of gene expression in all organisms, including bacteria(1–3). In most RNA-seq studies, it is  
46 desirable to eliminate rRNAs so that as many reads as possible come from mRNAs(4). For most  
47 eukaryotes, the majority of mRNAs are polyadenylated, enabling their selective isolation and  
48 subsequent sequencing(5, 6). In contrast, bacteria do not typically poly-adenylate their mRNAs,  
49 and rRNA comprises 80% or more of the total RNA harvested from a given sample(7). To enrich  
50 for mRNA in RNA-seq samples, a general strategy involves the depletion of rRNAs by subtractive  
51 hybridization(8–10). This approach was at the heart of commercially available kits such as Ribo-  
52 Zero from Illumina, leading to RNA-seq data in which ~80-90% of the reads map to mRNAs.  
53 Despite the popularity and efficacy of Ribo-Zero, this kit was recently discontinued by the  
54 manufacturer.

55 Here, we report an easily implemented, scalable, and broadly applicable do-it-yourself (DIY)  
56 rRNA depletion kit. Our kit relies on the physical depletion of rRNA from a complex RNA mixture  
57 using biotinylated oligonucleotides (oligos) specific to 5S, 16S, and 23S rRNA. We focus  
58 primarily on the development of oligos that will enable depletion of rRNA from any one of eight  
59 different, commonly studied bacteria. However, we also present an algorithm for customizing the  
60 subtractive oligos, and the open-source software developed here can be used to design  
61 oligonucleotides for the depletion of rRNA from any user-defined set of species. Our results  
62 indicate that the kit we developed enables the facile depletion of rRNA from total RNA samples  
63 such that ~70-80% of reads in RNA-seq map to mRNAs. We further demonstrate that our kit  
64 produces RNA-seq data showing high correspondence to that produced using Ribo-Zero kit.  
65 Additionally, our kit has a reduced cost of only ~\$10 per sample to deplete rRNA from 1 µg of  
66 total RNA. We anticipate that this rRNA-depletion strategy will benefit the entire bacterial  
67 community by enabling low-cost transcriptomics with a similar workflow to the previously  
68 available Ribo-Zero kit.

## 69 **Results**

70 To efficiently and inexpensively deplete rRNA from total RNA from multiple organisms, we  
71 developed an algorithm to design DNA oligonucleotides capable of hybridizing to rRNA from  
72 multiple species simultaneously. We reasoned that each rRNA should be bound by multiple oligos

73 across the length of the rRNA, in case a given site is hidden by structure or is not available due to  
74 partial fragmentation during RNA extraction or processing. Further, we decided that oligos should  
75 be as short as possible to reduce synthesis cost and decrease the likelihood of spurious binding and  
76 accidental depletion of mRNA. To find potential binding sites, we aligned the 16S and 23S rRNA  
77 sequences from a set of eight commonly studied bacteria, including several major pathogens and  
78 model organisms (Figure 1A, S1A). These sequences were divergent enough that we could not  
79 design an oligo based on the rRNA sequence of a single species and expect it to bind other the  
80 rRNA from other species effectively. Thus, we designed an algorithm to optimize the sequence of  
81 oligonucleotides, enabling them to hybridize to rRNA from multiple species. To find these oligos,  
82 we focused on ungapped regions of the alignment and chose a large number of sites as candidates  
83 (Figure 1B, S1B). For nucleotide positions that were completely conserved among the eight  
84 species, the conserved nucleotide was selected. For positions that were only partially conserved, a  
85 nucleotide was chosen at random such that it would match a nucleotide found in some but not all  
86 of the rRNAs.

87 We then performed an iterative process to sample alternate sequences and binding locations for  
88 each oligo, while biasing the selection toward sequences that tightly bind rRNA from the eight  
89 species we had selected. To do this, for each oligo we generated *in silico* a set of mutated  
90 oligonucleotides that varied from the original sequence by either extending, shrinking, or shifting  
91 the binding site, or by mutating a single nucleotide of the oligonucleotide to match a different  
92 species' rRNA. From this set of mutated oligonucleotides, the algorithm effectively replaced each  
93 old oligonucleotide with a new one, favoring those close to a target minimum  $T_m$  of 62.5 °C. This  
94  $T_m$  was chosen to achieve tight binding across all species while preventing selection of excessively  
95 long oligonucleotides. With more cycles of optimization, the average minimum  $T_m$  approaches the  
96 target  $T_m$  (Figure 1C, S1C). Notably, many oligonucleotides, particularly those with poorly  
97 conserved start locations, were not able to reach the target  $T_m$ , though the number that did increased  
98 with additional cycles (Figure 1D, S1D). After 15-20 cycles, the oligonucleotides had converged  
99 on highly conserved regions of the rRNAs (Figure 1B-D, S1B-D). After 100 cycles of  
100 optimization, we selected 8 and 9 non-overlapping oligonucleotides for the 16S and 23S rRNA,  
101 respectively, with an average length of 30 nucleotides. These 17 oligos are predicted to hybridize  
102 to rRNA from all eight species included in the initial design. Although the  $T_m$  for individual oligos  
103 varies across species, the mean  $T_m$  for the oligo set as a whole was similar (Figure 1E, S1E).

104 We also applied our algorithm to the 5S rRNA from the 8 species considered. However, because  
105 the 5S rRNA is both shorter and more poorly conserved than 16S and 23S rRNA, we were unable  
106 to find oligos that are predicted to effectively hybridize to the 5S rRNA from all eight species.  
107 Therefore, we ran the algorithm against individual 5S rRNAs and hand-selected two oligos specific  
108 to the 5S from each species. In addition, we found that the algorithm was unable to find oligos  
109 mapping near the 5'- and 3'-ends of the 23S due to its low conservation among species. To improve  
110 binding to these regions, we also identified two oligos that were specific to either Gram-positive  
111 or Gram-negative members of our target set of species. Thus, our final set of depletion oligos for  
112 a given organism includes 21 total oligos: 17 common oligos targeting 16S and 23S rRNA, 2 oligos  
113 that target 23S rRNA in a Gram positive- or Gram-negative-specific manner, and 2 species-  
114 specific 5S targeting oligos (Table S1; oligos each contain a 5'-biotin modification).

115 We then sought to determine whether our oligo libraries could effectively deplete bacterial rRNA.  
116 To deplete rRNAs from a total RNA sample, we incubated biotinylated versions of the 21 designed  
117 oligos with total RNA. Samples were then combined with magnetic streptavidin beads to  
118 precipitate the oligos bound to rRNAs, followed by isolation of the supernatant, which should be  
119 heavily enriched for mRNA (Figure 2A). We extracted total RNA from exponentially growing  
120 cultures of common lab strains of *E. coli*, *B. subtilis*, and *C. crescentus* and performed a single  
121 round of rRNA depletion. For all three species, incubation with the 21 depletion oligos  
122 substantially decreased the intensity of rRNA signal on a polyacrylamide gel, while tRNA and  
123 ncRNA were generally unaffected (Figure 2B). Moreover, this depletion was modular, as  
124 incubation of *E. coli* total RNA with probes targeting only 16S, 23S, or 5S rRNA resulted in  
125 selective depletion of the band corresponding to a given targeted rRNA (Figure 2B, left).

126 To quantify how well our method depleted rRNA, we performed RNA-seq on the three RNA  
127 samples pre- and post-rRNA depletion for *E. coli*, *B. subtilis*, and *C. crescentus*. We then  
128 calculated the fraction of reads mapping to rRNA loci in each case (Figure 2C). The fraction  
129 mapping to rRNA decreased following depletion from >95% to 13%, 6%, and 22%, respectively.  
130 To determine whether there was any bias for depletion of certain regions of the rRNAs, we  
131 compared read counts at each nucleotide position pre- and post-depletion in each *E. coli* rRNA  
132 (Figure 2D). For the 16S, 23S, and 5S rRNAs, read density was relatively uniform but lower,  
133 following depletion, indicating that no particular region of the rRNAs (e.g. regions prone to high

134 structure or partial degradation, preventing effective depletion) was over-represented in our rRNA  
135 reads.

136 Many RNA-seq studies are aimed at detecting significant differences in the expression of mRNA  
137 in different strains or across different perturbations. To ensure that our depletion technique did not  
138 affect the measurement of expression changes (e.g. through unintended depletion of particular  
139 mRNAs), we treated *E. coli* cells with either rifampicin or chloramphenicol for 5 minutes and  
140 compared fold changes measured from libraries generated using our depletion strategy to those  
141 generated using the previously available commercial kit Ribo-Zero (Illumina). For each depletion  
142 method, we calculated the  $\log_2$  fold-change in read counts in coding regions following antibiotic  
143 treatment compared to a negative control (Figure 3A-B). For both rifampicin and chloramphenicol  
144 treatment, the correlation in  $\log_2$  fold-change per coding region between the two rRNA depletion  
145 strategies was high ( $R^2 = 0.98$  and  $0.97$  for rifampicin and chloramphenicol, respectively) across  
146 a wide range of changes in gene expression. These results indicate that our method should provide  
147 similar results to the Ribo-Zero kit for studies measuring changes in gene expression.

148 Importantly, we also determined if our kit differentially depleted particular mRNAs compared to  
149 the Ribo-Zero kit. To do this, we directly compared the RPKM (reads per kilobase per million)  
150 values for well-expressed coding regions from a library prepared using our depletion strategy and  
151 one prepared using Ribo-Zero (Figure 3C). Overall, there was a high correlation between the two  
152 depletion methods ( $R^2 = 0.89$ ). However, there were a few outliers. We first identified genes more  
153 than two standard deviations away from a log-linear fit of RPKM in a comparison of RNA-seq  
154 data generated using our method and Ribo-Zero (Figure S2A). To ensure that fold-change in  
155 expression could also be accurately calculated for these outliers, we returned to the data generated  
156 following antibiotic treatment (Figure 3A-B). For the outlier genes, the change in expression  
157 following treatment with rifampicin or chloramphenicol was still highly correlated (Figure S2B-  
158 C;  $R^2 = 0.95$  and  $0.90$ , respectively). For a more stringent cut-off, we also hand-selected 11 of the  
159 most highly expressed outliers that were more significantly depleted by our method than Ribo-  
160 Zero (Figure S2D). Again, the changes in expression calculated following treatment with  
161 rifampicin or chloramphenicol were highly correlated (Figure S2E-F;  $R^2 = 0.96$  and  $0.89$  for  
162 rifampicin and chloramphenicol, respectively). Thus, results obtained based on our  
163 oligonucleotide hybridization approach are highly comparable to those generated with the  
164 previously-available Ribo-Zero kit.

165 Finally, we compared the RPKM values for well-expressed coding regions between libraries  
166 prepared using our depletion strategy and libraries from total RNA (no rRNA depletion) from *E.*  
167 *coli*, *B. subtilis*, and *C. crescentus* (Figure S3A). Depleted libraries for each species showed similar  
168 correlations of  $R^2 = 0.76$ ,  $0.71$ , and  $0.66$  for *E. coli*, *B. subtilis*, and *C. crescentus*, respectively  
169 (Figure S3A). Though this analysis is complicated by the relatively few reads mapping to mRNA  
170 in undepleted samples (Figure 2C), these results confirm that our method is an effective strategy  
171 for depleting rRNAs while maintaining transcriptome composition across multiple species. Taken  
172 all together, we conclude that our DIY method provides a broadly applicable, customizable, and  
173 cost-effective technique for determining changes in bacterial gene expression patterns in a wide  
174 range of organisms and experimental contexts.

## 175 Discussion

176 We have developed a simple, fast, easy-to-implement, and cost-effective method for efficiently  
177 depleting rRNA from complex, total RNA samples. For three different species, *E. coli*, *B. subtilis*,  
178 and *C. crescentus*, we demonstrated robust depletion of 23S, 16S, and 5S rRNAs in a single step  
179 such that ~70-90% of reads in RNA-seq arise from non-rRNA sources. This level of mRNA  
180 enrichment is sufficient for most RNA-seq studies. Our method showed relatively uniform  
181 depletion of rRNAs and minimal, unwanted 'off-targeting' of mRNAs. Additionally, expression  
182 changes measured using our method correlated very strongly ( $R^2 = 0.98$ ,  $0.97$ ; Figure 3A-B) to  
183 those measured using the previously available Ribo-Zero kit. This strong correlation both validates  
184 our method and ensures that data generated via either method can be safely compared or combined.

185 Another method has recently been developed as an alternative to the discontinued Ribo-Zero  
186 kit(11). This method is based on hybridization of DNA oligonucleotides to rRNAs followed by  
187 digestion with RNase H, which recognizes DNA:RNA hybrids. This method also enabled robust  
188 rRNA depletion, although a direct comparison of RNA-seq counts per gene generated using this  
189 method and Ribo-Zero was not reported. Additionally, this alternative method requires extended  
190 (~60 min) incubations with an RNase, albeit one that should be specific to DNA-RNA hybrids,  
191 whereas ours involves only hybridization and a precipitation step.

192 The set of biotinylated oligonucleotides tested here were designed to deplete the rRNA from a set  
193 of 8 selected organisms. These organisms span a large phylogenetic range so these  
194 oligonucleotides are likely broadly applicable to different bacterial species or even metagenomic

195 samples. However, the set of oligonucleotides can also be easily optimized for a different species  
196 or set of species using the open-source software developed here and available on Github. As noted,  
197 because the 5S rRNA is shorter and less conserved, probes specific to the 5S from a given species  
198 must typically be designed. However, the 5S rRNA does not yield nearly as many reads in RNA-  
199 seq data for a total RNA sample and may not require depletion for all studies.

200 In sum, the rRNA depletion methodology developed here should facilitate RNA-seq studies for  
201 any bacterium of interest. Notably, our method is also substantially cheaper than the Ribo-Zero  
202 kit. The cost of our method is ~\$10 per reaction to deplete 1  $\mu$ g of total RNA (see Methods)  
203 compared to ~\$80 per reaction for Ribo-Zero. The cost for our approach stems primarily from the  
204 magnetic streptavidin beads used to precipitate the biotinylated oligonucleotides bound to rRNA.  
205 Further optimization of the method reported here could likely reduce the cost further and possibly  
206 improve the extent of rRNA depletion. Nevertheless, as currently implemented, our method should  
207 enable the community to perform relatively easy, cost-effective, robust rRNA depletion, thereby  
208 facilitating RNA-seq studies.

209

210



## 211 **Materials and Methods**

### 212 **Oligonucleotide algorithm**

213 The algorithm was initialized with 500 and 1000 oligos of length 15 to 24 nucleotides for the 16S  
214 and 23S rRNA, respectively. Oligos were randomly positioned at non-gapped locations of the  
215 alignment of the 8 species we selected. Sequences were chosen by randomly selecting a nucleotide  
216 matching one or more species at each position. Sequences were then optimized to achieve the  
217 target predicted  $T_m$  of 62.5°C.  $T_m$  calculations were conducted using the MeltingTemp module in  
218 the biopython library. We used the default nearest-neighbor calculation table for RNA-DNA  
219 hybrids(12). Notably, this model does not allow prediction of  $T_m$  for some sequences with multiple  
220 sequential mismatches; as such, many oligos begin the optimization with undefined  $T_m$ .

221 Optimization was conducted by sequential rounds of ‘mutation’ on each oligo. Allowed mutations  
222 included moving the probe from 1-4 bases, shrinking the probe from 1-4 bases (on either end),  
223 extending the probe from 1-4 bases (on either end), or swapping the sequence of the oligo at one  
224 position to a nucleotide matching a different aligned rRNA. In each round of mutation, the starting  
225 oligo was mutated 25 times. From this set of mutated oligos, an oligo close to the target  $T_m$  was  
226 chosen probabilistically (probabilities were determined by a normal distribution centered at 62.5°C  
227 with a standard deviation of 2°C). This probabilistic selection, coupled with the large number of  
228 oligos initialized, enables oligos to sample the possible binding locations without greedily  
229 descending on the first possible binding site they discover. Each oligo was mutated for 100 cycles  
230 before oligos binding to a number of sites across the 16S and 23S were selected.

231 To enable better binding of the more variable 23S 5'- and 3'-ends, we split the organisms into two  
232 groups (Ec, Pa, Cc, Rp and Ms, Mtb, Bs, Sa) and re-ran the optimization algorithm as above. For  
233 each of these groups, we selected 2 additional oligos matching the 5'- and 3'-ends of the 23S.

### 234 **Data and code availability**

235 The code used to generate the oligonucleotides is available for download at  
236 <https://github.com/peterculviner/ribodeplete>. The raw and processed sequencing data is available  
237 on GEO (GSE142656).

### 238 **Bacterial strains and culture condition**

239 *E. coli* MG1655 was grown to mid-log phase at 37 °C in LB medium or M9 medium supplemented  
240 with 0.1% casamino acids, 0.4% glucose, 2 mM MgSO<sub>4</sub>, and 0.1 mM CaCl<sub>2</sub>. *C. crescentus*

241 CB15N/NA1000 was grown to mid-log phase in PYE medium at 30 °C. *B. subtilis* 168 was grown  
242 to mid-log phase at 37 °C in LB medium. For quantifying changes in expression from antibiotic  
243 treatment, cells were harvested 5 minutes after adding chloramphenicol or rifampicin at 50 µg/mL  
244 or 25 µg/mL, respectively.

#### 245 **RNA extraction**

246 *E. coli* RNA was harvested by mixing 1 mL of cells with 110 µL of ice-cold stop solution (95%  
247 ethanol and 5% acid-buffered phenol) and spinning in a table-top centrifuge for 30 s at 13000 rpm.  
248 *C. crescentus* RNA was harvested by spinning down 2 mL of cells in a table-top centrifuge for 30  
249 s at 13000 rpm. After removing the supernatant, pellets were flash-frozen and stored at -80 °C until  
250 sample collection was complete. To extract RNA, TRIzol (Invitrogen) was heated to 65 °C and  
251 added to each cell pellet. The mixtures were then shaken at 65 °C for 10 min at 2000 rpm in a  
252 thermomixer and flash-frozen at -80 °C for at least 10 min. Pellets were thawed at room  
253 temperature and spun at top speed in a benchtop centrifuge at 4 °C for 5 min. The supernatant was  
254 added to 400 µL of 100% ethanol and passed through a DirectZol spin column (Zymo). Columns  
255 were washed twice with RNA PreWash buffer (Zymo) and once with RNA Wash buffer (Zymo),  
256 and RNA was eluted in 90 µL DEPC H<sub>2</sub>O. To remove genomic DNA, RNA was then treated with  
257 4 µL of Turbo DNase I (Invitrogen) in 100 µL supplemented 10x Turbo DNase I buffer for 40 min  
258 at 37 °C. RNA was then diluted with 100 µL DEPC H<sub>2</sub>O, extracted with 200 µL buffered acid  
259 phenol-chloroform, and ethanol precipitated at -80 °C for 4 hr with 20 µL of 3 M NaOAc, 2 µL  
260 GlycoBlue (Invitrogen), and 600 µL ice-cold ethanol. Samples were centrifuged at 4 °C for 30 min  
261 at 21000 x g to pellet RNA, then washed twice with 500 µL of ice-cold 70% ethanol, followed by  
262 centrifugation at 4 °C for 5 min. RNA pellets were then air-dried and resuspended in DEPC H<sub>2</sub>O.  
263 RNA yield was quantified by a NanoDrop spectrophotometer, and RNA integrity was verified by  
264 running 50 ng of total RNA on a Novex 6% TBE-urea polyacrylamide gel (Invitrogen).

265 *B. subtilis* total RNA was harvested by mixing 5 mL of cell culture with 5 mL of cold (-30 °C)  
266 methanol and spinning down at 5000 rpm for 10 min. After removing the supernatant, pellets were  
267 frozen at -80 °C. To lyse cells, pellets were vortexed in 100 µL lysozyme (10 mg/mL) in TE (10  
268 mM Tris-HCl and 1 mM EDTA) at pH = 8.0 and incubated for 5 min at 37 °C. Lysates were  
269 cleared by adding 350 µL Buffer RLT (Qiagen) in 1% beta-mercaptoethanol and vortexing.  
270 Lysates were then mixed with 250 µL ethanol, vortexed, and passed through an RNeasy mini spin  
271 column (Qiagen). Columns were washed with 350 µL Buffer RW1 (Qiagen). To remove genomic

272 DNA, 40  $\mu$ L of DNaseI in Buffer RDD (Qiagen) was applied to each column, and columns were  
273 incubated at room temperature for 15 min. Columns were then washed once with 350  $\mu$ L Buffer  
274 RW1 (Qiagen) and twice with Buffer RPE (Qiagen), and RNA was eluted in 30  $\mu$ L DEPC H<sub>2</sub>O.  
275 RNA yield was quantified by a NanoDrop spectrophotometer, and RNA integrity was verified by  
276 running 50 ng of total RNA on a Novex 6% TBE-urea polyacrylamide gel (Invitrogen).

### 277 **rRNA depletion, DIY method**

278 Biotinylated oligos were selected using our algorithm, synthesized by IDT, and resuspended to  
279 100  $\mu$ M in Buffer TE (Qiagen). An undiluted oligo mix for each organism was created by mixing  
280 equal volumes of all 16S and 23S primers, as well as double volumes of 5S primers. This undiluted  
281 mix was then diluted based on the amount of total RNA added to the depletion reaction, using a  
282 custom bead calculator (available with code at <https://github.com/peterculviner/ribodeplete>).

283 Dynabeads MyOne Streptavidin C1 beads (ThermoFisher) were washed three times in an equal  
284 volume of 1x B&W buffer (5 mM Tris HCl pH = 7.0, 5 mM Tris HCl pH = 7.0, 500  $\mu$ M EDTA,  
285 1 M NaCl) and then resuspended in 30  $\mu$ L of 2x B&W buffer (10 mM Tris HCl pH = 7.0, 10 mM  
286 Tris HCl pH = 7.0, 1 mM EDTA, 2 M NaCl). To prevent RNase contamination, 1  $\mu$ L of  
287 SUPERase-In RNase Inhibitor (ThermoFisher) was added to the beads. The beads were then  
288 incubated at room temperature until probe annealing (below) was complete.

289 To anneal biotinylated probes to rRNA, 2-3  $\mu$ g total RNA, 20x SSC, 30 mM EDTA, water, and  
290 the diluted probe mix were mixed on ice in the calculated quantities. The mixtures were incubated  
291 in a thermocycler at 70  $^{\circ}$ C for 5 min, followed by a slow ramp down to 25  $^{\circ}$ C at a rate of 1  $^{\circ}$ C per  
292 30 sec. To pull down biotinylated probes bound to rRNA, annealing reactions were then added  
293 directly to beads in 2x B&W buffer, mixed by pipetting and vortexing at medium speed, and  
294 incubated for 5 min at room temperature. Reactions were then vortexed on medium speed and  
295 incubated at 50  $^{\circ}$ C for 5 min, and then placed directly on a magnetic rack to separate beads from  
296 the remaining total RNA. The supernatant was pipetted away from the beads, placed on ice, and  
297 diluted to 200  $\mu$ L in DEPC H<sub>2</sub>O. RNA was then ethanol precipitated at -20  $^{\circ}$ C for at least 1 hour  
298 with 20  $\mu$ L of 3 M NaOAc, 2  $\mu$ L GlycoBlue (Invitrogen), and 600  $\mu$ L ice-cold ethanol. Samples  
299 were centrifuged at 4  $^{\circ}$ C for 30 min at 21000 x g to pellet RNA, then washed twice with 500  $\mu$ L  
300 of ice-cold 70% ethanol, followed by centrifugation at 4  $^{\circ}$ C for 5 min. RNA pellets were then air-  
301 dried and resuspended in 10  $\mu$ L DEPC H<sub>2</sub>O. RNA yield was quantified by a NanoDrop

302 spectrophotometer, and the efficiency of rRNA depletion was verified by running 50 ng of total  
303 RNA on a Novex 6% TBE-urea polyacrylamide gel (Invitrogen).

### 304 **Optimization of rRNA depletion**

305 In the process of generating our depletion protocol, we tried multiple ratios of streptavidin-coated  
306 beads to biotinylated oligos and biotinylated oligos to total RNA. We found that rRNA was  
307 depleted robustly across a range of ratios. However, it was critical to have a significant excess of  
308 streptavidin-coated beads over biotinylated oligos, as oligos that do not successfully capture rRNA  
309 may bind streptavidin more rapidly, thus out-competing bound rRNA-bound oligos and reducing  
310 rRNA capture efficiency. We selected our final ratios to achieve reliable depletion of rRNA at a  
311 low per-reaction cost.

### 312 **Cost calculation**

313 The majority of reagents are common laboratory supplies for labs that work with RNA. To  
314 maintain the optimized ratio between streptavidin beads, biotinylated oligos, and rRNA, more  
315 oligos and beads must be used to deplete more total RNA. Considering the input, the cost per  
316 reaction is approximately \$10, \$19, or \$28 for 1, 2 or 3  $\mu$ g of RNA, respectively. The majority of  
317 the cost per reaction arises from streptavidin-coated magnetic beads; cost could likely be further  
318 decreased by using cheaper streptavidin-coated beads or decreasing the quantity of beads used (see  
319 above). The up-front cost of purchasing oligos (IDT) is approximately \$1000 for large scale  
320 synthesis or \$500 for smaller scale synthesis (available for sets of oligos  $>24$ ). However, a single  
321 oligo synthesis order is adequate for hundreds of depletion reactions.

### 322 **RNA-seq library preparation**

323 Libraries were generated as previously with a few modifications described below(13). The library  
324 generation protocol was a modified version of the paired-end strand-specific dUTP method using  
325 random hexamer priming. For libraries without rRNA removal, 500 ng of total RNA was used in  
326 the fragmentation step. For libraries with rRNA removal, 2-3  $\mu$ g of input RNA was used in the  
327 rRNA removal step.

### 328 **rRNA depletion by Ribo-Zero**

329 rRNA depletion via Ribo-Zero treatment (Illumina) was conducted as described previously(13).  
330 Briefly, provided magnetic beads were prepared individually by adding 225  $\mu$ L of beads to a  
331 1.5 mL tube, left to stand on a magnetic rack for 1 minute, washed twice with 225  $\mu$ L of water,

332 and resuspended in 65  $\mu\text{L}$  of provided resuspension solution with 1  $\mu\text{L}$  of provided RNase  
333 inhibitor. Samples were prepared using provided reagents with 4  $\mu\text{L}$  of reaction buffer, 2-3  $\mu\text{g}$  of  
334 total RNA, 10  $\mu\text{L}$  of rRNA removal solution in a total reaction volume of 40  $\mu\text{L}$ . Samples were  
335 incubated at 68  $^{\circ}\text{C}$  for 10 minutes and at room temperature for 5 minutes. Samples were added  
336 directly to the resuspended magnetic beads, mixed by pipetting, incubated for 5 minutes at room  
337 temperature, and then incubated for 5 minutes at 50  $^{\circ}\text{C}$ . After incubation, samples were placed on  
338 magnetic rack and the supernatant was transferred to a new tube, discarding the beads. Samples  
339 were ethanol precipitated as above with a 1 hour incubation at  $-20^{\circ}\text{C}$  and resuspended in 9  $\mu\text{L}$  of  
340 water.

#### 341 **Fragmentation**

342 RNA libraries were fragmented by adding 1  $\mu\text{L}$  of 10x fragmentation buffer (Invitrogen) to 9  $\mu\text{L}$   
343 of input RNA in DEPC  $\text{H}_2\text{O}$  and heating at 70  $^{\circ}\text{C}$  for 8 min. Fragmentation reactions were stopped  
344 by immediately placing on ice and adding 1  $\mu\text{L}$  of stop solution (Invitrogen). Reactions were  
345 diluted to 20  $\mu\text{L}$  in DEPC  $\text{H}_2\text{O}$ , and RNA was ethanol precipitated at  $-20^{\circ}\text{C}$  for at least 1 hour  
346 with 2  $\mu\text{L}$  of 3 M NaOAc, 2  $\mu\text{L}$  GlycoBlue (Invitrogen), and 60  $\mu\text{L}$  ice-cold ethanol. Samples were  
347 centrifuged at 4  $^{\circ}\text{C}$  for 30 min at 21000 x g to pellet RNA, then washed with 200  $\mu\text{L}$  of ice-cold  
348 70% ethanol, followed by centrifugation at 4  $^{\circ}\text{C}$  for 5 min. RNA pellets were then air-dried and  
349 resuspended in 6  $\mu\text{L}$  DEPC  $\text{H}_2\text{O}$ .

#### 350 **cDNA synthesis**

351 1  $\mu\text{L}$  of random primers at 3  $\mu\text{g}/\mu\text{L}$  (Invitrogen) were added to fragmented RNA, and the mixture  
352 was heated at 65  $^{\circ}\text{C}$  for 5 min and placed on ice for 1 min. To conduct first strand synthesis, 4  $\mu\text{L}$   
353 of first strand synthesis buffer (Invitrogen), 2  $\mu\text{L}$  of 100 mM DTT, 1  $\mu\text{L}$  of 10 mM dNTPs, 1  $\mu\text{L}$   
354 of SUPERase-In (Invitrogen), and 4  $\mu\text{L}$  of DEPC  $\text{H}_2\text{O}$  were added to each reaction. Reaction  
355 mixtures incubated at room temperature for 2 minutes, followed by addition of 1  $\mu\text{L}$  of Superscript  
356 III. Reactions were then placed in a thermocycler for the following program: 25  $^{\circ}\text{C}$  for 10 min, 50  
357  $^{\circ}\text{C}$  for 1 hr, and 70  $^{\circ}\text{C}$  for 15 min. To extract cDNA, reactions were diluted to 200  $\mu\text{L}$  in DEPC  
358  $\text{H}_2\text{O}$ , then vortexed with 200  $\mu\text{L}$  of neutral phenol-chloroform isoamyl alcohol. Following  
359 centrifugation, the aqueous layer was extracted, and cDNA was ethanol precipitated at  $-20^{\circ}\text{C}$  for  
360 at least 1 hour with 18.5  $\mu\text{L}$  of 3 M NaOAc, 2  $\mu\text{L}$  GlycoBlue (Invitrogen), and 600  $\mu\text{L}$  ice-cold  
361 ethanol. Samples were centrifuged at 4  $^{\circ}\text{C}$  for 30 min at 21000 x g to pellet cDNA, then washed  
362 twice with 500  $\mu\text{L}$  of ice-cold 70% ethanol, followed by centrifugation at 4  $^{\circ}\text{C}$  for 5 min. Pellets

363 were then air-dried and resuspended in 104  $\mu\text{L}$  DEPC  $\text{H}_2\text{O}$ . Second strand synthesis was conducted  
364 by adding 30  $\mu\text{L}$  of second strand synthesis buffer (Invitrogen), 4  $\mu\text{L}$  of 10 mM dNTPs (with dUTP  
365 instead of dTTP), 4  $\mu\text{L}$  of first strand synthesis buffer (Invitrogen), and 2  $\mu\text{L}$  of 100 mM DTT to  
366 each sample, followed by incubation on ice for 5 min. To initiate second strand synthesis, 1  $\mu\text{L}$  of  
367 RNase H (NEB), 1  $\mu\text{L}$  of *E. coli* DNA ligase (NEB), and 4  $\mu\text{L}$  of *E. coli* DNA polymerase I (NEB)  
368 were added to each sample. Reactions were then incubated at 16  $^\circ\text{C}$  for 2.5 hr.

### 369 **End-repair and adaptor ligation**

370 Cleanup for second strand synthesis and all subsequent steps was conducted using Agencourt  
371 AMPure XP magnetic beads (Beckman Coulter), and beads were left in the reaction to be reused  
372 for subsequent cleanup steps. For each sample, 100  $\mu\text{L}$  of beads were added to 1.5 mL tubes and  
373 placed on a magnetic rack. The supernatant was removed and replaced with 450  $\mu\text{L}$  of 20% (w/v)  
374 PEG 8000 in 2.5 M NaCl. Second strand synthesis reactions were then added directly to  
375 resuspended beads, mixed by pipetting and vortexing, and incubated at room temperature for 5  
376 min. Samples were then placed on a magnetic rack for  $\sim$ 10 min, or until the solution was clear,  
377 and the supernatant was removed. Beads were then washed twice in 500  $\mu\text{L}$  of 80% ethanol, dried,  
378 and resuspended in 50  $\mu\text{L}$  of elution buffer (Qiagen). End repair reactions were conducted by  
379 adding 10  $\mu\text{L}$  of 10x T4 DNA ligase buffer (NEB), 4  $\mu\text{L}$  of 10 mM dNTPs, 5  $\mu\text{L}$  of T4 DNA  
380 polymerase (NEB), 1  $\mu\text{L}$  of Klenow DNA polymerase (NEB), 5  $\mu\text{L}$  of T4 polynucleotide kinase  
381 (NEB), and 25  $\mu\text{L}$  of DEPC  $\text{H}_2\text{O}$  and incubating at 25  $^\circ\text{C}$  for 30 min. To clean up the reactions,  
382 300  $\mu\text{L}$  of 20% (w/v) PEG 8000 in 2.5 M NaCl was mixed with each reaction by pipetting and  
383 vortexing. Samples were then incubated at room temperature for 5 min, and then placed on a  
384 magnetic rack for  $\sim$ 5 min. The supernatant was removed, and the beads were then washed twice  
385 in 500  $\mu\text{L}$  of 80% ethanol, dried, and resuspended in 32  $\mu\text{L}$  of elution buffer (Qiagen). 3'-  
386 adenylation reactions were conducted by adding 5  $\mu\text{L}$  of NEB buffer 2 (NEB), 1  $\mu\text{L}$  10 mM dATP,  
387 3  $\mu\text{L}$  Klenow fragment (3' $\rightarrow$ 5' exo-) (NEB), and 9  $\mu\text{L}$  of DEPC  $\text{H}_2\text{O}$  to each reaction and  
388 incubating at 37  $^\circ\text{C}$  for 30 min. To clean up the reactions, 150  $\mu\text{L}$  of 20% (w/v) PEG 8000 in 2.5  
389 M NaCl was mixed with each reaction by pipetting and vortexing. Samples were then incubated  
390 at room temperature for 5 min, and then placed on a magnetic rack for  $\sim$ 5 min. The supernatant  
391 was removed, and the beads were then washed twice in 500  $\mu\text{L}$  of 80% ethanol, dried, and  
392 resuspended in 20  $\mu\text{L}$  of elution buffer (Qiagen). To elute DNA from the beads, reactions were  
393 incubated at room temperature for 5 min. Tubes were then returned to the magnetic rack and

394 incubated for 1-2 min to allow the solution to clear, and then half of the supernatant (10  $\mu$ L) was  
395 removed and stored at -20 °C in case of downstream failure. To ligate adaptors to DNA, 1  $\mu$ L of 5  
396  $\mu$ M annealed adaptors and 10  $\mu$ L of Blunt/TA ligase master mix (NEB) was added to each reaction,  
397 and reactions were incubated at 25 °C for 20 min. Annealed adaptor mix was made by mixing  
398 25  $\mu$ L of a 200  $\mu$ M solution of each paired-end adaptor together, heating to 90°C for 2 minutes,  
399 cooling at 2°C/minute for 30 minutes on a thermocycler, placing on ice, adding 50  $\mu$ L of water,  
400 and storing aliquots at -20°C. To clean up ligation reactions, 60  $\mu$ L of 20% (w/v) PEG 8000 in  
401 2.5 M NaCl was mixed with each reaction by pipetting and vortexing, and reactions were incubated  
402 at room temperature for 5 min. Reactions were then placed on a magnetic rack for ~10 min, until  
403 solutions were clear, and the supernatant was removed. The beads were then washed twice in 500  
404  $\mu$ L of 80% ethanol, dried, and resuspended in 19  $\mu$ L of 10 mM Tris-HCl (pH = 8) and 0.1 mM  
405 EDTA. Reactions were then incubated at room temperature for 5 min to completely elute DNA.  
406 Tubes were then returned to the magnetic rack and incubated for 1-2 min to allow the solution to  
407 clear, and then the supernatant was removed and moved to a new tube and the beads discarded. To  
408 digest the dUTP-containing second strand, 1  $\mu$ L of USER enzyme (NEB) was added to 19  $\mu$ L of  
409 eluted DNA and incubated at 37 °C for 15 min, followed by heat-inactivation at 95 °C for 5 min.

#### 410 **Library amplification**

411 PCR reactions were prepared by mixing 10  $\mu$ L of library template (diluted if too concentrated), 2  
412  $\mu$ L of 25  $\mu$ M global primer, 2  $\mu$ L of 25  $\mu$ M barcoded primer, 11  $\mu$ L of H<sub>2</sub>O, and 25  $\mu$ L of 2x  
413 KAPA HiFi HotStart ReadyMix (Roche). Reactions were then cycled through the following  
414 thermocycler protocol: 98 °C/45 s, 98 °C/15 s, 60 °C/30 s, 72 °C/30 s, 72 °C/1 min. Steps 2-4 were  
415 repeated for 9-12 cycles, depending on the results of 10  $\mu$ L optimization reactions. Following  
416 amplification, PCR reactions were run on an 8% TBE polyacrylamide gel (Invitrogen) for 30 min  
417 at 180 V, and the region from 200 to 350 bp was excised, crushed, soaked in 500  $\mu$ L 10 mM Tris  
418 pH = 8.0, and frozen at -20 °C for at least 15 min. To elute DNA from the gel, reactions were  
419 shaken at 2000 rpm for 10 min at 70 °C in a thermomixer, followed by 1 hr at 37 °C. Reactions  
420 were then spun through a Spin-X 0.22  $\mu$ m cellulose acetate column (Costar) and transferred to a  
421 new tube. Libraries were isopropanol precipitated by adding 32  $\mu$ L 5 M NaCl, 2  $\mu$ L GlycoBlue  
422 (Invitrogen), and 550  $\mu$ L 100% isopropanol and incubating at -20 °C for at least 1 hr. Samples  
423 were then centrifuged at 4 °C for 30 min at 21000 x g to pellet DNA, then washed with 1 mL of  
424 ice-cold 70% ethanol, followed by centrifugation at 4 °C for 5 min. DNA pellets were then air-

425 dried and resuspended in 11  $\mu$ L H<sub>2</sub>O. Paired-end sequencing of amplified libraries was then  
426 performed on an Illumina NextSeq500, and single-end sequencing on an Illumina MiSeq.

#### 427 **RNA-sequencing read mapping and normalization.**

428 FASTQ files for each barcode were mapped to the *E. coli* MG1655 genome (NC\_000913.2), the  
429 *B. subtilis* 168 genome (NC\_000964.3), or the *C. crescentus* NA1000 genome (NC\_011916.1)  
430 using bowtie2 (version 2.1.0) with the following arguments: -D 20 -R 3 -N 0 -L 20 -i S,1,0.50.  
431 The samtools (version 0.1.19) suite was used via the pysam library (version 0.9.1.4) for  
432 interconversion of BAM and SAM file formats and conducting indexing. Gene names and coding  
433 region positions were extracted from NCBI annotations.

#### 434 **Single-end sequencing**

435 For all analyses except that of fragment density across *E. coli* rRNA loci, one count was added to  
436 the middle of each read. All reads mapping to a given coding region were then summed and  
437 normalized by reads per kilobase of transcript per million (RPKM). This normalized quantity was  
438 then used in all downstream analyses.

439 For analysis of fragment density across rRNA loci, one count was added for all positions between  
440 and including the 5'- and 3'- ends of reads. To correct for variability in sequencing depth, counts  
441 at each position were divided by a sample size factor. Briefly, counts recorded in each genomic  
442 region were summed for all samples and then the geometric mean was taken across samples to  
443 yield a reference sample. The size factor for a given sample was the median counts in all regions  
444 after normalizing counts to the reference samples.

#### 445 **Analysis of oligo depletion efficiency**

446 To quantify the efficiency of rRNA depletion, the sum of reads mapping to rRNA loci was divided  
447 by the total number of mapped reads in each sample. To compare the reads mapping to individual  
448 coding regions following rRNA depletion and/or antibiotic treatment (Figures 3A-C, S2A-F, and  
449 S3A), coding regions were filtered for expression by RPKM, and then the correlation between  
450 RPKM for individual coding regions was compared using the SciPy statistical functions package.  
451 Outliers for the ratio of reads per coding region following Ribo-Zero versus DIY treatment (Figure  
452 S2A) were identified by measuring the distance for all genes in Cartesian coordinates from the  
453 log-log least squares fit for all regions above the expression threshold. Outliers were defined as



454 genes for which this ratio was less than or greater than two standard deviations from the mean line.  
455 Outliers in Figure S2D were hand-picked.

## 456 **Acknowledgements**

457 The co-first authors discussed and mutually agreed on the author order. We thank I. Frumkin and  
458 I. Nocedal for comments on the manuscript, D. Parker and M. Guzzo for reagents, and M. Guo for  
459 helpful discussions. This work was funded by an NIH grant to M.T.L. (R01GM082899), who is  
460 also an Investigator of the Howard Hughes Medical Institute. This work was also supported by  
461 NSF predoctoral graduate research fellowships to P.H.C. and C.K.G.

462

## 463 **References**

- 464 1. Hör J, Gorski SA, Vogel J. 2018. Bacterial RNA Biology on a Genome Scale. *Mol Cell*  
465 70:785–799.
- 466 2. Croucher NJ, Thomson NR. 2010. Studying bacterial transcriptomes using RNA-seq. *Curr*  
467 *Opin Microbiol* 13:619–624.
- 468 3. Creecy JP, Conway T. 2015. Quantitative bacterial transcriptomics with RNA-seq. *Curr*  
469 *Opin Microbiol* 23:133–140.
- 470 4. Podnar J, Deiderick H, Huerta G, Hunicke-Smith S. 2014. Next-generation sequencing  
471 RNA-Seq library construction. *Curr Protoc Mol Biol* 1–19.
- 472 5. Nagalakshmi U, Wang Z, Waern K, Shou C, Raha D, Gerstein M, Snyder M. 2008. The  
473 transcriptional landscape of the yeast genome defined by RNA sequencing. *Science* (80- )  
474 320:1344–1349.
- 475 6. Mortazavi A, Williams BA, McCue K, Schaeffer L, Wold B. 2008. Mapping and  
476 quantifying mammalian transcriptomes by RNA-Seq. *Nat Methods* 5:621–628.
- 477 7. Westermann AJ, Gorski SA, Vogel J. 2012. Dual RNA-seq of pathogen and host. *Nat Rev*  
478 *Microbiol* 10:618–630.
- 479 8. Herbert ZT, Kershner JP, Butty VL, Thimmapuram J, Choudhari S, Alekseyev YO, Fan J,  
480 Podnar JW, Wilcox E, Gipson J, Gillaspay A, Jepsen K, BonDurant SS, Morris K, Berkeley  
481 M, LeClerc A, Simpson SD, Sommerville G, Grimmett L, Adams M, Levine SS. 2018.  
482 Cross-site comparison of ribosomal depletion kits for Illumina RNAseq library  
483 construction. *BMC Genomics* 19:1–10.
- 484 9. Stewart FJ, Ottesen EA, DeLong EF. 2010. Development and quantitative analyses of a  
485 universal rRNA-subtraction protocol for microbial metatranscriptomics. *ISME J* 4:896–  
486 907.
- 487 10. He S, Wurtzel O, Singh K, Froula JL, Yilmaz S, Tringe SG, Wang Z, Chen F, Lindquist  
488 EA, Sorek R, Hugenholtz P. 2010. Validation of two ribosomal RNA removal methods for  
489 microbial metatranscriptomics. *Nat Methods* 7:807–812.
- 490 11. Huang Y, Sheth RU, Kaufman A, Wang HH. 2019. Scalable and cost-effective

- 491            ribonuclease-based rRNA depletion for transcriptomics. *Nucleic Acids Res.*
- 492    12.    Sugimoto N, Nakano S, Katoh M, Matsumura A, Nakamuta H, Ohmichi T, Yoneyama M,  
493            Sasaki M. 1995. Thermodynamic Parameters To Predict Stability of RNA/DNA Hybrid  
494            Duplexes. *Biochemistry* 34:11211–11216.
- 495    13.    Culviner PH, Laub MT. 2018. Global Analysis of the *E. coli* Toxin MazF Reveals  
496            Widespread Cleavage of mRNA and the Inhibition of rRNA Maturation and Ribosome  
497            Biogenesis. *Mol Cell* 70:868-880.e10.
- 498
- 499

## 500 **Figure Legends**

### 501 **Figure 1. Oligonucleotide selection for 16S rRNA.**

502 (A) Alignment of 16S sequences from 8 bacterial species (Ec = *E. coli*; Pa = *P. aeruginosa*; Rp =  
503 *R. parkeri*; Cc = *C. crescentus*; Bs = *B. subtilis*; Ms = *M. smegmatis*; Mtb = *M. tuberculosis*; Sa =  
504 *S. aureus*). Alignment gaps are shown as red lines in the particular species of the gap. Regions  
505 with a gap in any species are highlighted in pink; these regions were not considered when designing  
506 oligos.

507 (B) The position, length, and minimum  $T_m$  of all oligos plotted against the 16S alignment after the  
508 indicated number of optimization cycles (top). The information content at each nucleotide position  
509 of aligned regions is also shown (bottom, points). To highlight conserved regions, a sliding average  
510 information content is also plotted (bottom, line).

511 (C) Oligo  $T_m$  statistics after multiple cycles of the  $T_m$  optimization algorithm. For each oligo ( $n =$   
512 250), we calculated the minimum  $T_m$  across the 8 species considered and then plotted the mean of  
513 this value across all oligos (black). The  $T_m$  cannot be accurately estimated for oligos with multiple  
514 sequential mismatches; the number of oligos with an undefined  $T_m$  is also plotted (blue).

515 (D) Histograms of minimum  $T_m$  for oligos at the indicated number of optimization cycles. Data  
516 were generated as in (C), but oligo  $T_m$  minima were used to generate histograms rather than taking  
517 the mean across all oligos. Oligos with an undefined  $T_m$  were not included in the histograms.

518 (E) Distribution of  $T_m$  values for each 16S-targeting oligo ( $n = 8$ ) for each individual species  
519 indicated. The mean  $T_m$  of oligos for each species is also shown (red lines). Note that the same  
520 oligos are used for each species, but because of 16S sequence variability, the  $T_m$  can vary, as  
521 illustrated for one particular oligo (blue).

### 522 **Figure 2. rRNA depletion by oligonucleotide-based hybridization.**

523 (A) Cartoon of the rRNA depletion process.

524 (B) Polyacrylamide gel showing total RNA from *E. coli*, *B. subtilis*, and *C. crescentus* pre- and  
525 post-rRNA depletion using indicated probe sets. The first lane is a ladder. Approximate positions  
526 of abundant RNAs, including rRNAs, is indicated on the right. Note that a lower contrast is shown  
527 for the top portion of the gel to resolve 16S and 23S bands.

528 (C) Fraction of total reads aligning to rRNA for rRNA-undepleted and -depleted samples of *E.*  
529 *coli*, *B. subtilis*, and *C. crescentus* total RNA.

530 (D) Summed read counts across the *E. coli* 16S, 23S, and 5S rRNAs pre- (red) and post- (blue)  
531 depletion. The positions of oligos used for depletion are shown below.

532 **Figure 3. Our rRNA depletion strategy performs comparably to Ribo-Zero for RNA-seq.**

533 (A) Scatterplot showing correlation between  $\log_2$  fold changes for *E. coli* coding regions following  
534 rifampicin treatment, comparing rRNA depletion via Ribo-Zero with our depletion strategy. Fold  
535 changes were calculated as the ratio of RPKM between rifampicin treated and untreated samples.  
536 All coding regions with at least 64 RPKM in both untreated samples ( $n = 1294$ ) were considered  
537 in the analysis.

538 (B) Scatterplot showing correlation between  $\log_2$  fold changes for *E. coli* coding regions following  
539 chloramphenicol treatment, comparing rRNA depletion via Ribo-Zero with our depletion strategy.  
540 Fold changes were calculated as the ratio of RPKM between chloramphenicol-treated and  
541 untreated samples. All coding regions with at least 64 RPKM in both untreated samples ( $n = 1294$ )  
542 were considered in the analysis.

543 (C) Scatterplot showing correlation between read counts (RPKM) for *E. coli* coding regions treated  
544 with Ribo-Zero and our do-it-yourself (DIY) depletion strategy. All coding regions with at least  
545 64 RPKM in both samples ( $n = 1294$ ) were considered in the analysis.

546

## 547 **Supplemental Figure Legends**

### 548 **Figure S1. Oligonucleotide selection for 23S rRNA**

549 (A) Alignments of all 23S sequences from 8 bacterial species (Ec = *E. coli*; Pa = *P. aeruginosa*;  
550 Rp = *R. parkeri*; Cc = *C. crescentus*; Bs = *B. subtilis*; Ms = *M. smegmatis*; Mtb = *M. tuberculosis*;  
551 Sa = *S. aureus*). Alignment gaps are shown as red lines in the particular species of the gap. Regions  
552 with a gap in any species are highlighted in pink; these regions were not considered when designing  
553 oligos.

554 (B) The position, length, and minimum  $T_m$  of all oligos plotted against the 23S alignment after the  
555 indicated number of optimization cycles (top). The information content at each nucleotide position  
556 of aligned regions is also shown (bottom, points). To highlight conserved regions, a sliding average  
557 information content is also plotted (bottom, line).

558 (C) Oligo  $T_m$  statistics after multiple cycles of the  $T_m$  optimization algorithm. For each oligo ( $n =$   
559 500), we calculated the minimum  $T_m$  across the 8 species considered and then plotted the mean of  
560 this value across all oligos (black). The  $T_m$  cannot be accurately estimated for oligos with multiple  
561 sequential mismatches; the number of oligos with an undefined  $T_m$  is also plotted (blue).

562 (D) Histograms of minimum  $T_m$  for oligos at the indicated number of optimization cycles. Data  
563 were generated as in (C), but oligo  $T_m$  minima were used to generate histograms rather than taking  
564 the mean across all oligos. Oligos with undefined  $T_m$  were not included in the histograms.

565 (E) Distribution of  $T_m$  values for each 23S-targeting oligo ( $n = 11$ ) for each individual species  
566 indicated. The mean  $T_m$  of oligos for each species is also shown (red lines). Note that the same  
567 oligos are used for each species, but because of 23S sequence variability, the  $T_m$  can vary, as  
568 illustrated for one particular oligo (blue).

### 569 **Figure S2. Analysis of outliers in correlation between mRNA counts following Ribo-Zero and** 570 **DIY rRNA depletion.**

571 (A) Figure 3C, with all genes at least two standard deviations away from the least squares fit line  
572 (red) indicated in black ( $n = 69$ ).

573 (B) Figure 3A, with outliers identified in Figure S3A marked in black. For these outliers, the  
574 correlation between  $\log_2$  (rif+/negative control) for DIY depletion and Ribo-Zero treatment was  
575 0.95, compared to 0.98 for all well-expressed coding regions.

576 (C) Figure 3B, with outliers identified in Figure S3A marked in black. For these outliers, the  
577 correlation between  $\log_2$  (chl+/negative control) for DIY depletion and Ribo-Zero treatment was  
578 0.90, compared to 0.97 for all well-expressed coding regions.

579 (D) Figure 3C, with 11 highly-expressed genes more depleted in our method than in Ribo-Zero  
580 indicated in black.

581 (E) Figure 3A, with outliers identified in Figure S3D marked in black. For these outliers, the  
582 correlation between  $\log_2$  (rif+/negative control) for DIY depletion and Ribo-Zero treatment was  
583 0.96, compared to 0.98 for all well-expressed coding regions.

584 (F) Figure 3B, with outliers identified in Figure S3D marked in black. For these outliers, the  
585 correlation between  $\log_2$  (chl+/negative control) for DIY depletion and Ribo-Zero treatment was  
586 0.89, compared to 0.97 for all well-expressed coding regions.

587 **Figure S3. Correlation between counts per coding region pre- and post-rRNA depletion for**  
588 ***B. subtilis* and *C. crescentus* total RNA.**

589 (A) Top left: scatterplot showing correlation between read counts (RPKM) for *E. coli* coding  
590 regions pre- and post-rRNA depletion using our depletion strategy. All coding regions with at least  
591 10 counts in both samples ( $n = 438$ ) were considered in this analysis. Top right: scatterplot showing  
592 correlation between read counts (RPKM) for *B. subtilis* coding regions pre- and post-rRNA  
593 depletion using our depletion strategy. All coding regions with at least 10 counts in both samples  
594 (784 regions total) were considered in the analysis. Bottom: scatterplot showing correlation  
595 between read counts (RPKM) for *C. crescentus* coding regions pre- and post-rRNA depletion using  
596 our depletion strategy. All coding regions with at least 10 counts in both samples (398 regions  
597 total) were considered in the analysis.

598 (B) Fold-depletion for various ratios of oligo probe : RNA and streptavidin bead : oligo probe  
599 ratios. Depletions were calculated by qRT-PCR to a single region within each rRNA relative to a  
600 bead-only negative control.

**Figure 1**

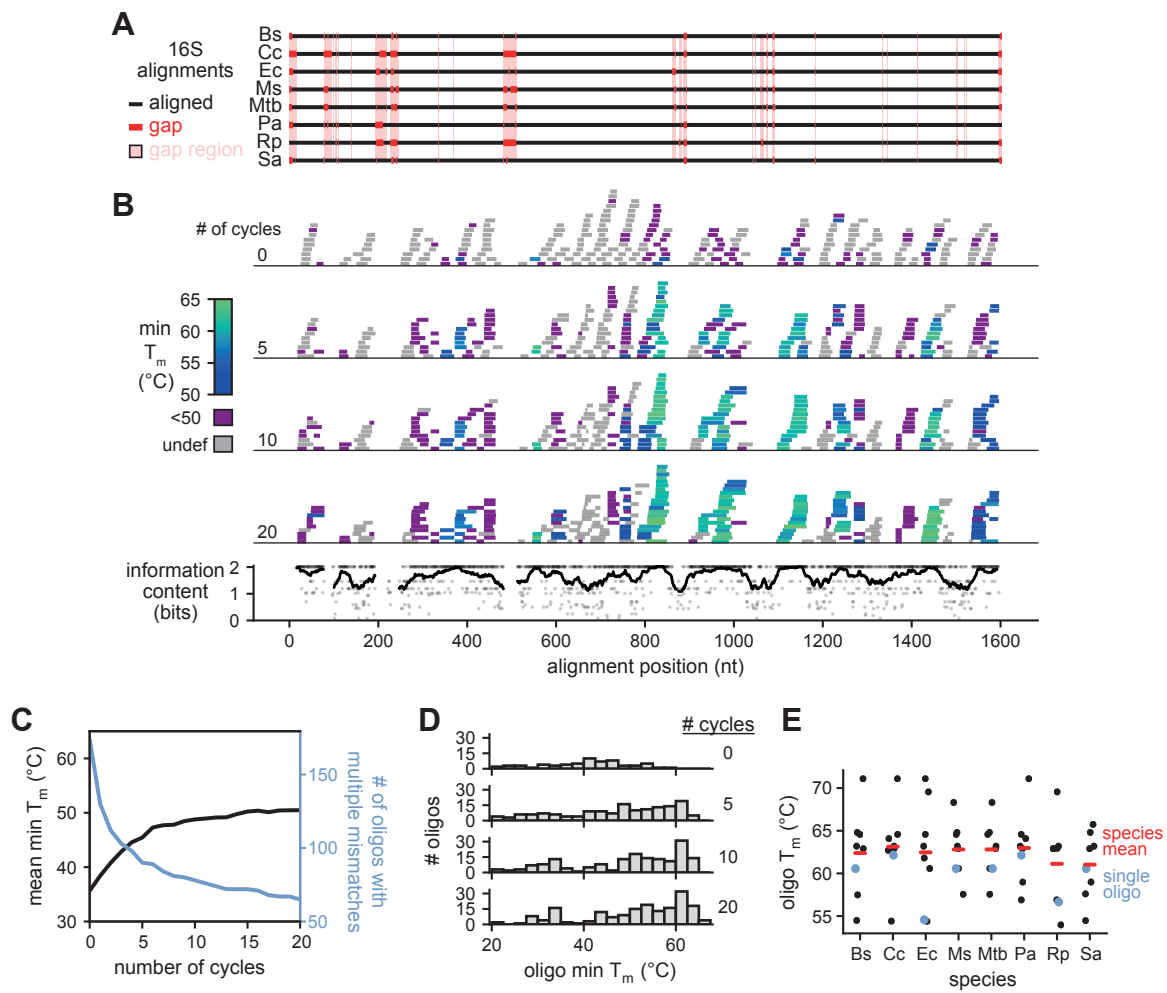



**A**

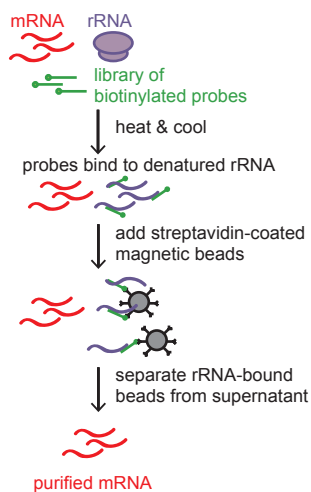

**B**

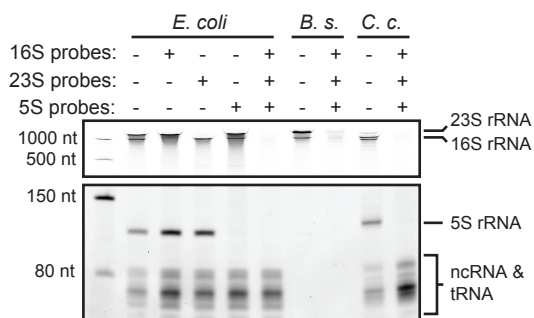

**C**

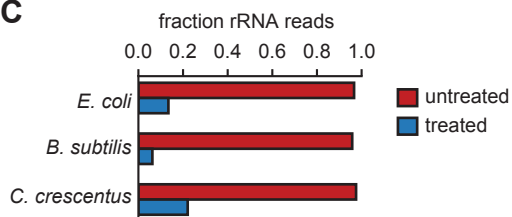

**D**

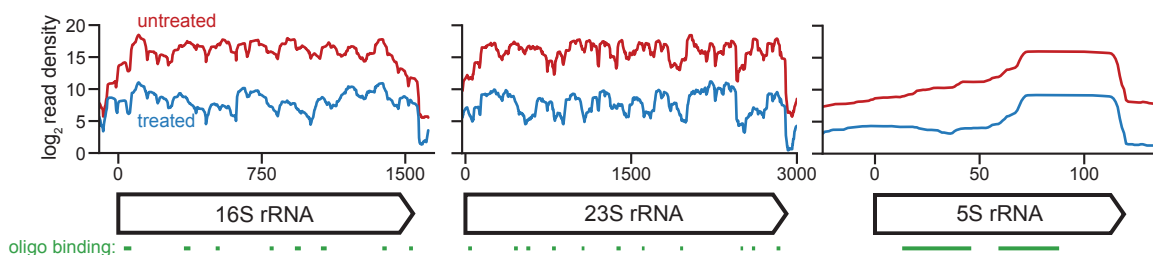

Figure 3

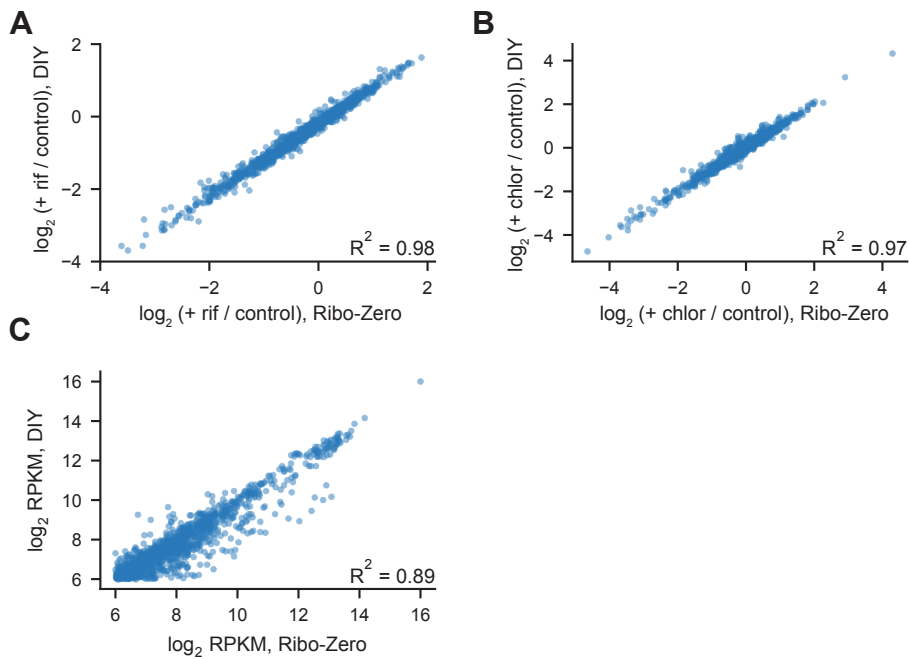

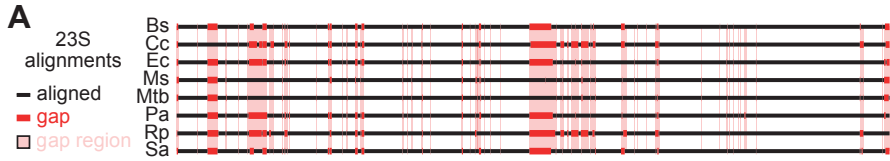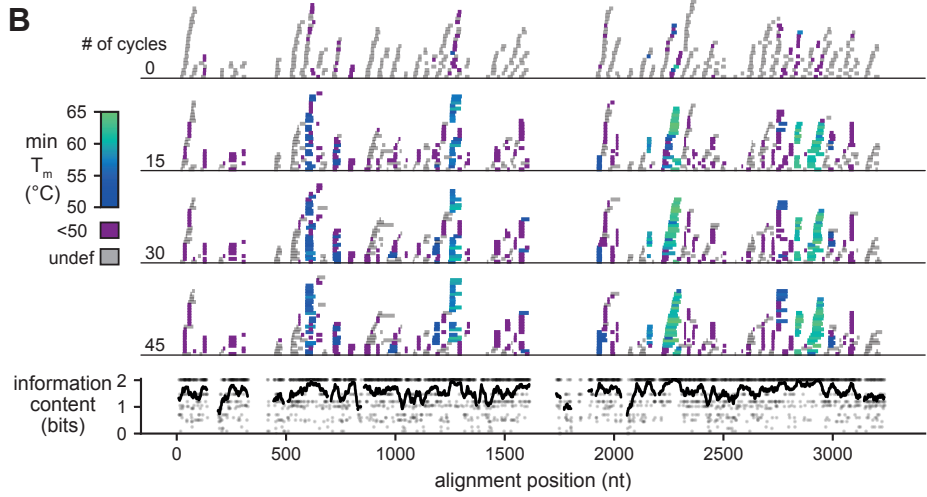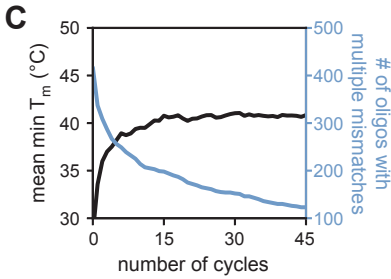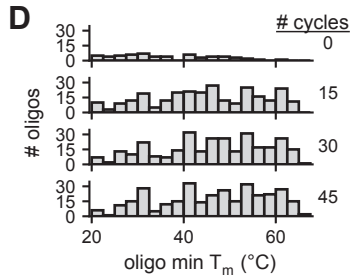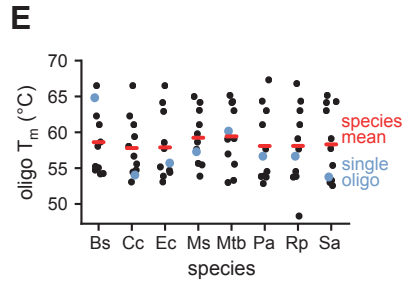

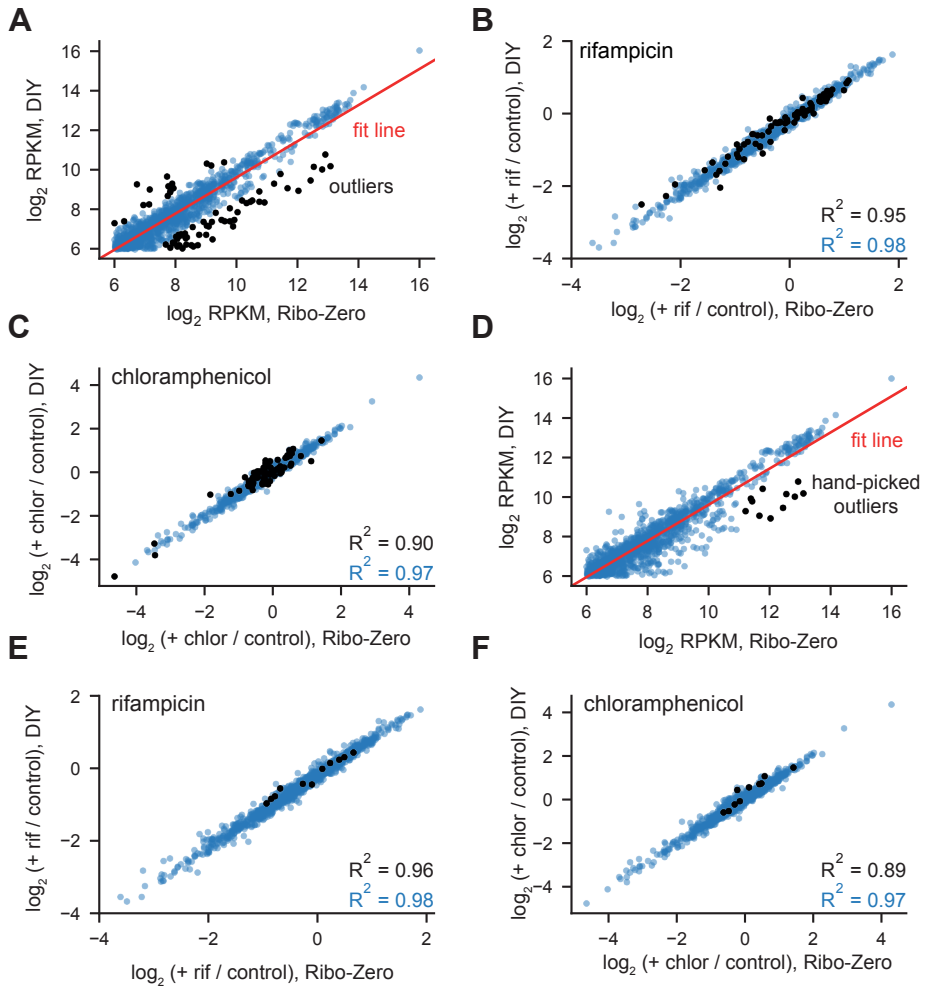

**A**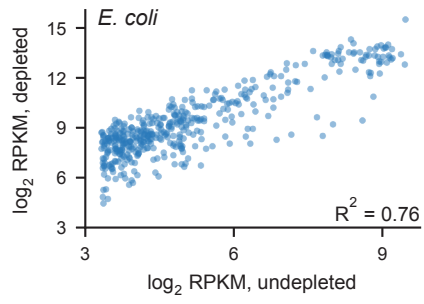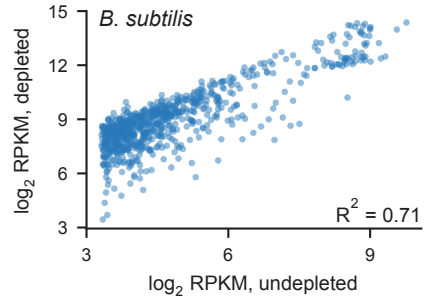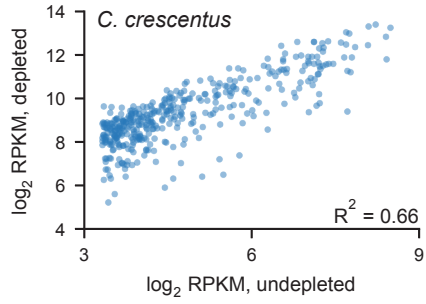

Table S1 - Sequences of oligonucleotides for bacterial rRNA depletion

| <u>Name</u> | <u>Sequence</u>                          |
|-------------|------------------------------------------|
| 23S_1       | ACCTTTCCCTCACGGTACTGGTTCGCTATCGGTCA      |
| 23S_2       | AGTCGCTGGCTCATTATACAAAAGGTACGCCGTCACC    |
| 23S_3       | TCGGGGAGAACCAGCTATCTCCGGGTTTGATTGGC      |
| 23S_4       | GTGGCTGCTTCTAAGCCAACATCCTG               |
| 23S_5       | GGGTACAGGAATATTAACCTGATTTCCATCGACTACGCC  |
| 23S_6       | CACCTGTGTCGGTTTGGGGTACGGT                |
| 23S_7       | TCGTGCGGGTCGGAACCTTACCCGACAAG            |
| 23S_8       | GAGCCGACATCGAGGTGCCAAACA                 |
| 23S_9       | CGGCGGATAGGGACCGAACTGTCTCACGAC           |
| 16S_1       | CCGCTCGACTTGCATGTGTTAAGCATGCCGACAGCGTTCC |
| 16S_2       | CCCATTGTGCAAGATTCCCTACTGCTGCCTCCCGT      |
| 16S_3       | ACCGCGGCTGCTGGCACGGAGT                   |
| 16S_4       | ACGGCGTGGACTACCAGGGTAT                   |
| 16S_5       | TCCACATGCTCCACCGCTTGTGCGGGCCCCCG         |
| 16S_6       | ACCCAACATCTCACAAACACGAGCTGACGACA         |
| 16S_7       | GGGCAGTGTGTACAAGGCCCGGGA                 |
| 16S_8       | AAGGAGGTGATCCAGCCGCAG                    |
| 23S_GN1     | CACGTCCTTCATCGCCTTTTACTGCCAAGGCATCC      |
| 23S_GN2     | CCACACCCGGCCTATCAACGTGGTGGTCTTCGACG      |
| 23S_GP1     | ATGCCAAGGCATCCACCATGCGCCCT               |
| 23S_GP2     | TATCCTGTCCGCACGTGGCTACCCAGCG             |
| 5S_EcPa_1   | GTTTCGGGAAGGGGTTCAGGTGGGTCCAACGCGCTA     |
| 5S_EcPa_2   | AGACCCACACTACCATCGGCGATACGTCG            |
| 5S_Sa_1     | GCATGGGAACAGGTGTGACCTCCTTGCTAT           |
| 5S_Sa_2     | GCGGAACGTAAGTTCGACTACCATCGACGCT          |
| 5S_Bs_1     | GGTATGGGAACGGGTGTGACCTCTTCGCTA           |
| 5S_Bs_2     | CGACTACCATCGGCGCTGAAGAGCTTAAC            |
| 5S_Cc_1     | CCGAGTTCGGAATGGGATCGGGTGGG               |
| 5S_Cc_2     | CTTGAGACGAAGTACCATTGGCCCAGGG             |
| 5S_Rp_1     | GGATGGGATCGTGTGTTTCACTCATGCTATAACCACC    |
| 5S_Rp_2     | TCCCATGCCTTATGACATAGTACCATTAGCGCTAT      |
| 5S_MtbMs_1  | ACCGGGCGTTTCCCTGCCGCTA                   |
| 5S_MtbMs_2  | GGTAGTATCATCGGCGCTGGCAGG                 |
